# Supplementary material
Source: PubMed Central journal article supplement (PMC4443339)
Supplement: pnas.201501979SI.pdf [file pnas.201501979SI.pdf]

# Supporting Information

Leopold et al. 10.1073/pnas.1501979112

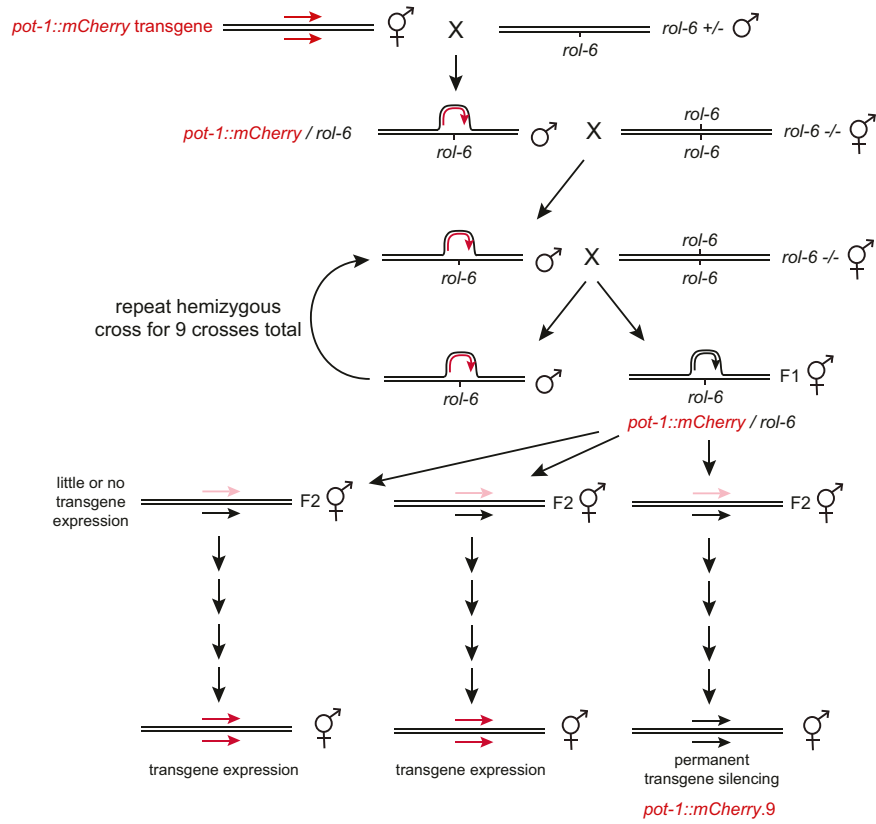

Fig. S1. Crossing scheme that created *pot-1::mCherry.9*.

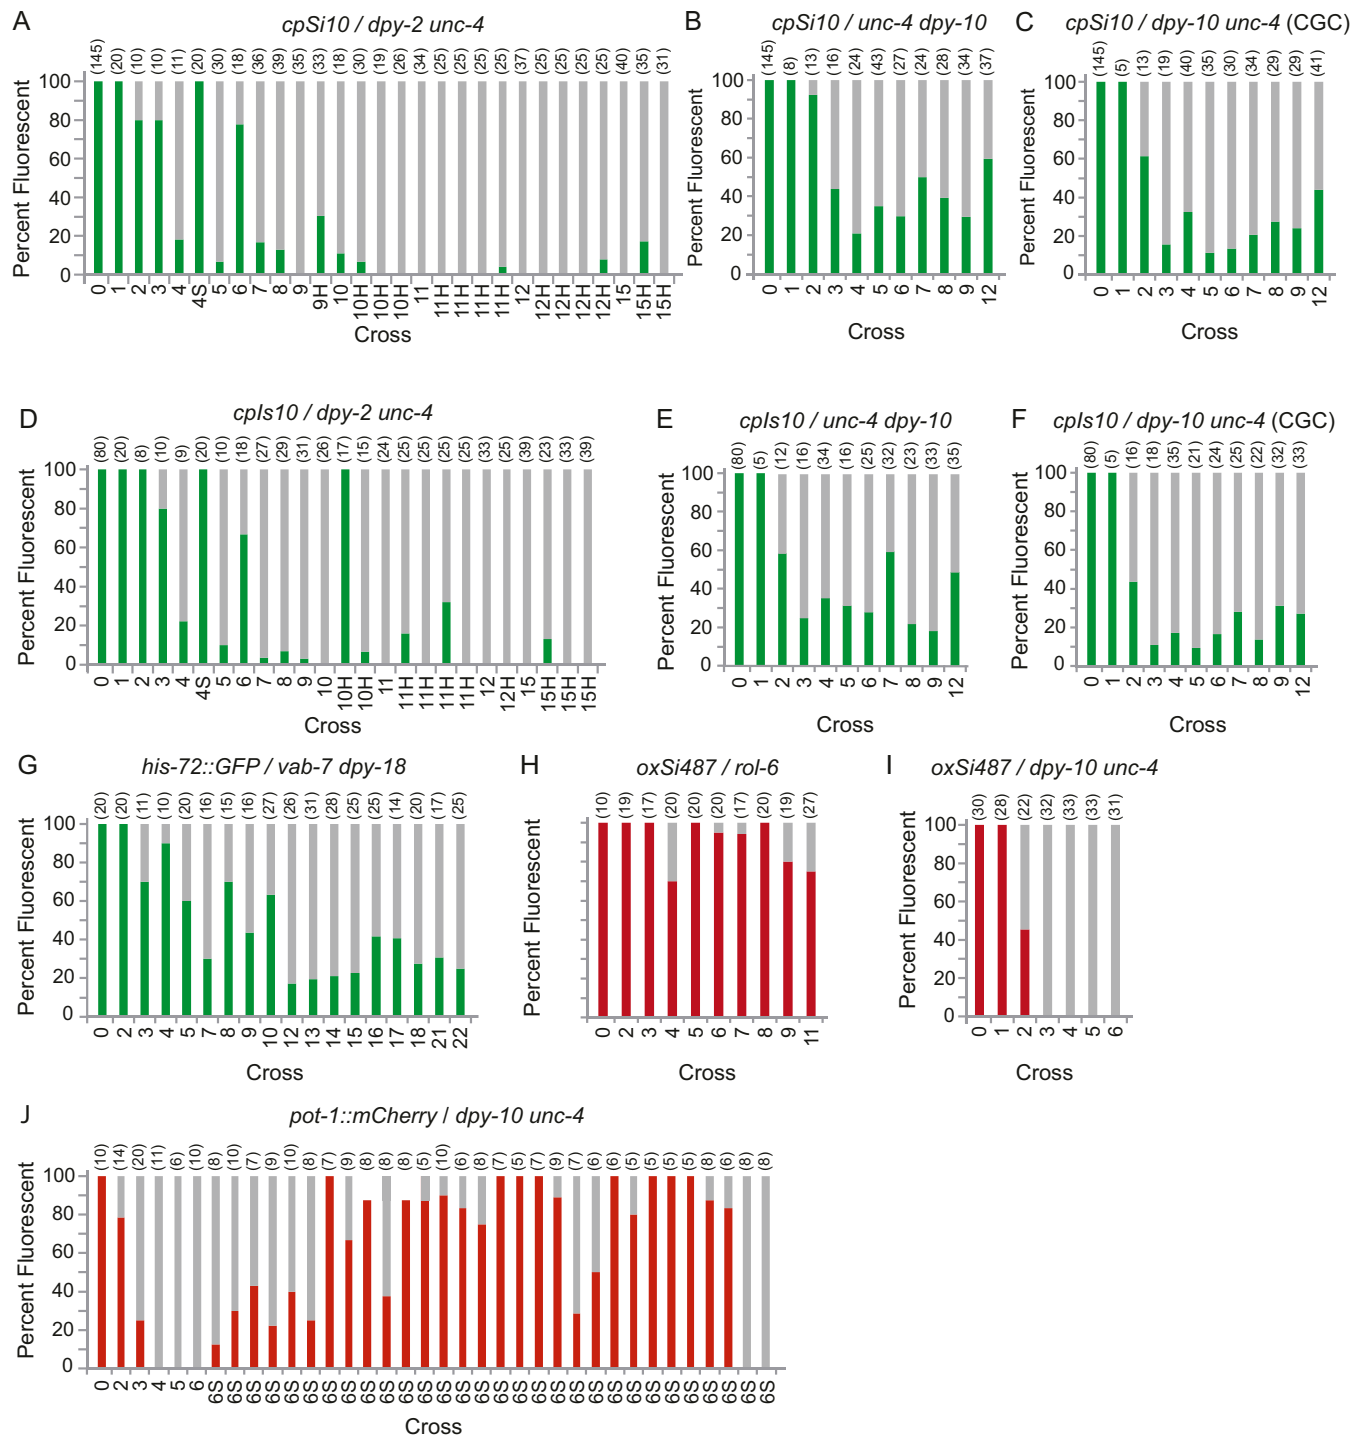

**Fig. S2.** Crossing various transgenes with various markers induces multigenerational RNAe silencing at variable rates and penetrance levels. Percent of population fluorescent at each round of crossing for (A–F) *cpSi10* and *cpls10* using *dpy-2 unc-4*, *unc-4 dpy-10*, or *dpy-10 unc-4* (obtained from *Caenorhabditis Genetics Center*) balancer chromosomes; (G) *his-72::GFP* using *vab-7 dpy-18* marker strain; (H and I) *oxSi487* using either *rol-6* or *dpy-10 unc-4* balancer chromosomes; and (J) *pot-1::mCherry* using a *dpy-10 unc-4* balancer chromosome. Numbers at Top in parentheses indicate number of worms scored. Bar 0 indicates original transgenic strain before crossing. 5 denotes homozygous F3 worms derived from starved heterozygous transgene/marker. H denotes homozygous F3 worms derived from heterozygous transgene/marker.

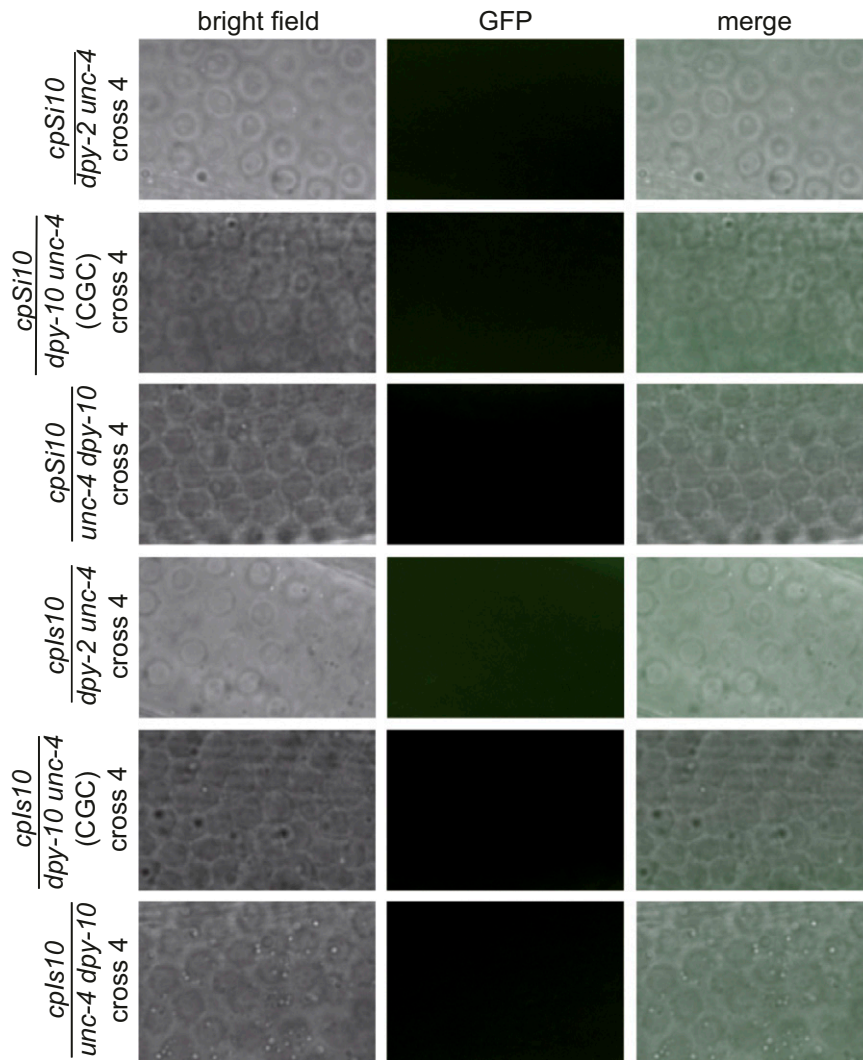

**Fig. S3.** Widefield microscopy images of brightfield (*Left column*), GFP fluorescence (*Center column*), and a merged image (*Right column*) from silent transgenic strains in Fig. S2 A–F (60x).

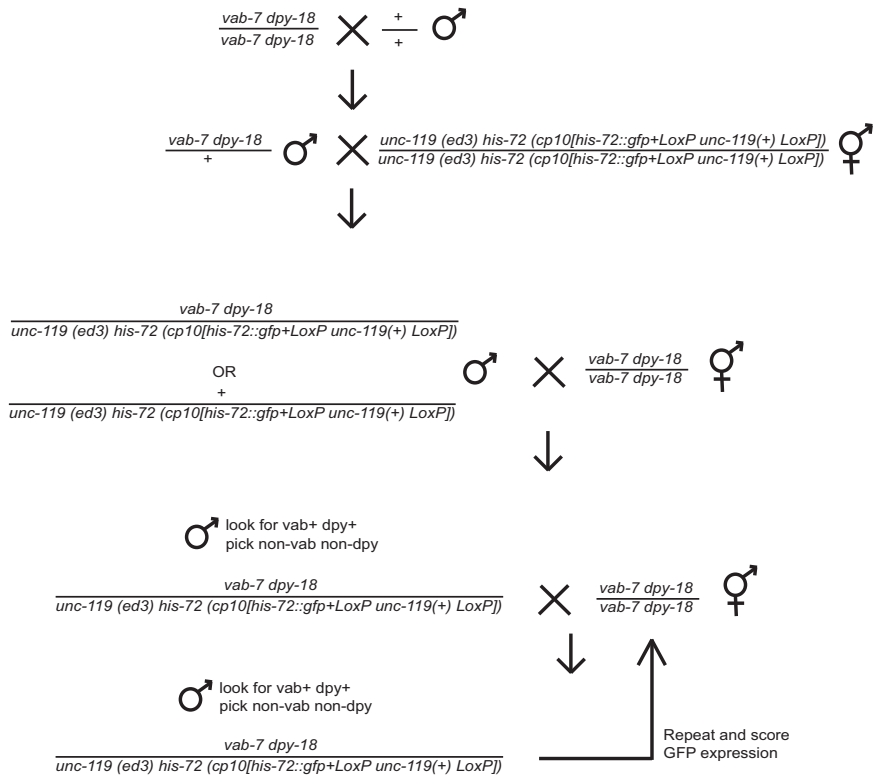

**Fig. S4.** Schema used to cross the *his-72::GFP* transgene using chromosome III marker mutations *vab-7 dpy-18*.
